# Supplementary material
Source: PubMed Central journal article supplement (PMC6669040)
Supplement: 10-1055-s-0039-1693711-s190065ra.pdf [file 10-1055-s-0039-1693711-s190065ra.pdf]

**Supplementary Table S1 DVT and PE-related ICD-9-CM and CPT codes****I. DVT****A. DVT-related ICD-9-CM codes**

| CM codes         | Definition                                                                                                                                                                                            |
|------------------|-------------------------------------------------------------------------------------------------------------------------------------------------------------------------------------------------------|
| 451.11           | Phlebitis and thrombophlebitis of femoral vein (deep) (superficial)                                                                                                                                   |
| 451.19           | Phlebitis and thrombophlebitis of deep veins of lower extremities, other                                                                                                                              |
| 451.2            | Phlebitis and thrombophlebitis of lower extremities, unspecified                                                                                                                                      |
| 451.81           | Phlebitis and thrombophlebitis of the iliac vein                                                                                                                                                      |
| 451.83           | Phlebitis and thrombophlebitis of deep veins of upper extremities                                                                                                                                     |
| 451.84           | Phlebitis and thrombophlebitis of upper extremities, unspecified                                                                                                                                      |
| 451.89           | Phlebitis and thrombophlebitis of other sites                                                                                                                                                         |
| 451.9            | Phlebitis and thrombophlebitis of unspecified site                                                                                                                                                    |
| 453.2            | Other venous embolism and thrombosis of inferior vena cava                                                                                                                                            |
| 453.40           | Acute venous embolism and thrombosis of unspecified deep vessels of lower extremity                                                                                                                   |
| 453.41           | Acute venous embolism and thrombosis of deep vessels of proximal lower extremity                                                                                                                      |
| 453.42           | Acute venous embolism & thrombosis of deep vessels of distal lower extremity                                                                                                                          |
| 453.82           | Acute venous embolism and thrombosis of deep veins of upper extremity                                                                                                                                 |
| 453.83           | Acute venous embolism and thrombosis of upper extremity, unspecified                                                                                                                                  |
| 453.84           | Acute venous embolism and thrombosis of axillary veins                                                                                                                                                |
| 453.85           | Acute venous embolism and thrombosis of subclavian veins                                                                                                                                              |
| 453.86           | Acute venous embolism and thrombosis of internal jugular veins                                                                                                                                        |
| 453.87           | Acute venous embolism and thrombosis of other thoracic veins                                                                                                                                          |
| 453.89           | Acute venous embolism and thrombosis of other specified veins                                                                                                                                         |
| 671.3<br>[0,1,3] | Deep phlebothrombosis, antepartum [0 = unspecified as to episode of care or not applicable, 1 = delivered, with or without mention of antepartum condition, 3 = antepartum condition or complication] |
| 671.4<br>[0,2,4] | Deep phlebothrombosis, postpartum [0 = unspecified as to episode of care or not applicable, 2 = delivered, with mention of postpartum complication, 4 = postpartum condition or complication]         |
| 671.5 [0-4]      | Other phlebitis and thrombosis in pregnancy and the puerperium [0-4 codes as above]                                                                                                                   |
| 671.9[0-4]       | Unspecified venous complication in pregnancy and the puerperium [0-4 codes as above]                                                                                                                  |

**B. DVT-related ICD-9-CPT codes (selected)**

| CPT codes | Definition                                                                                                                                                                                                                                                              |
|-----------|-------------------------------------------------------------------------------------------------------------------------------------------------------------------------------------------------------------------------------------------------------------------------|
| 34401     | Thrombectomy, direct or with catheter; vena cava, iliac vein, by abdominal incision                                                                                                                                                                                     |
| 34421     | Thrombectomy, direct or with catheter; vena cava, iliac, femoropopliteal vein, by leg incision                                                                                                                                                                          |
| 34451     | Thrombectomy, direct or with catheter; vena cava, iliac, femoropopliteal vein, by abdominal and leg incision                                                                                                                                                            |
| 34471     | Thrombectomy, direct or with catheter, subclavian vein, by neck incision                                                                                                                                                                                                |
| 34490     | Thrombectomy, direct or with catheter, axillary and subclavian vein, by arm incision                                                                                                                                                                                    |
| 01522     | Venous thrombectomy, direct or with catheter                                                                                                                                                                                                                            |
| 37187[-8] | Percutaneous transluminal mechanical thrombectomy, vein(s), including intraprocedural pharmacological thrombolytic injections and fluoroscopic guidance [and repeat treatment on subsequent day during course of thrombolytic therapy]                                  |
| 37191     | Insertion of intravascular vena cava filter, endovascular approach inclusive of vascular access, vessel selection, and all radiological supervision and interpretation, intraprocedural road mapping, and imaging guidance (ultrasound and fluoroscopy), when performed |
| 37201     | Transcatheter therapy, infusion for thrombolysis other than coronary                                                                                                                                                                                                    |

## II. PE

### A. PE-related ICD-9-CM codes

| CM codes   | Definition                                                                                                                                                                                                                                                                                            |
|------------|-------------------------------------------------------------------------------------------------------------------------------------------------------------------------------------------------------------------------------------------------------------------------------------------------------|
| 415.11     | Iatrogenic pulmonary embolism and infarction                                                                                                                                                                                                                                                          |
| 415.13     | Saddle embolus of pulmonary artery                                                                                                                                                                                                                                                                    |
| 415.19     | Other pulmonary embolism and infarction                                                                                                                                                                                                                                                               |
| 634.6[0-2] | Spontaneous abortion, complicated by embolism [0 = unspecified, 1 = incomplete, 2 = complete]                                                                                                                                                                                                         |
| 635.6[0-2] | Legally induced abortion, complicated by embolism [0-2 codes as above]                                                                                                                                                                                                                                |
| 636.6[0-2] | Illegal abortion, complicated by embolism [0-2 codes as above]                                                                                                                                                                                                                                        |
| 637.6[0-2] | Legally unspecified abortion, complicated by embolism [0-2 codes as above]                                                                                                                                                                                                                            |
| 638.6      | Failed attempted abortion, complicated by embolism                                                                                                                                                                                                                                                    |
| 639.6      | Embolism following abortion or ectopic and molar pregnancies                                                                                                                                                                                                                                          |
| 673.2[0-4] | Obstetrical blood-clot embolism [0 = unspecified as to episode of care or not applicable, 1 = delivered, with or without mention of antepartum condition, 2 = delivered, with mention of postpartum complication, 3 = antepartum condition or complication, 4 = postpartum condition or complication] |

### B. PE-related ICD-9-CPT codes (selected)

| CPT codes | Definition                                                                                                                                                                                                                                                              |
|-----------|-------------------------------------------------------------------------------------------------------------------------------------------------------------------------------------------------------------------------------------------------------------------------|
| 33910     | Pulmonary artery embolectomy, with cardiopulmonary bypass                                                                                                                                                                                                               |
| 33915     | Pulmonary artery embolectomy, without cardiopulmonary bypass                                                                                                                                                                                                            |
| 37187[-8] | Percutaneous transluminal mechanical thrombectomy, vein(s), including intraprocedural pharmacological thrombolytic injections and fluoroscopic guidance [and repeat treatment on subsequent day during course of thrombolytic therapy]                                  |
| 37191     | Insertion of intravascular vena cava filter, endovascular approach inclusive of vascular access, vessel selection, and all radiological supervision and interpretation, intraprocedural road mapping, and imaging guidance (ultrasound and fluoroscopy), when performed |
| 37201     | Transcatheter therapy, infusion for thrombolysis other than coronary                                                                                                                                                                                                    |

## III. Nonspecific VTE (w/o other DVT/PE codes)

| CM code | Definition                                                                                       |
|---------|--------------------------------------------------------------------------------------------------|
| 453.9   | Other venous embolism and thrombosis, of unspecified site (embolism of vein; thrombosis of vein) |

## IV. Anticoagulant therapy (for use with DVT, PE, or nonspecific VTE, defined above)

| CM code | Definition                                             |
|---------|--------------------------------------------------------|
| V58.61  | Long-term (current) use of anticoagulants              |
| V58.63  | Long-term (current) use of antiplatelet/antithrombotic |

Abbreviations: CPT, Current Procedural Terminology; DVT, deep vein thrombosis; ICD-9-CM, International Classification of Diseases, Ninth Revision, Clinical Modification; PE, pulmonary embolism; VTE, venous thromboembolism.
